# Supplementary material for: Genetic Mapping and QTL Analysis of Fruit Traits in Melon (Cucumis melo L.)
Source: Curr Issues Mol Biol. 2023 Apr 14;45(4):3419–33. doi: 10.3390/cimb45040224 (PMC10137213; doi:10.3390/cimb45040224)
Supplement: Supplementary file 1 [file cimb-45-00224-s001.zip]

Archive with 5 entries (5 files):
- Supplementary Figure and Table.pdf
- Supplementary Figure S1.pdf
- Supplementary Table S1.xlsx
- Supplementary Table S2.xlsx
- Supplementary Table S3.xlsx
