# Supplementary material for: Genetic Mapping and QTL Analysis of Fruit Traits in Melon (Cucumis melo L.)
Source: Curr Issues Mol Biol. 2023 Apr 14;45(4):3419–33. doi: 10.3390/cimb45040224 (PMC10137213; doi:10.3390/cimb45040224)
Supplement: Supplementary file 1 [file cimb-45-00224-s001.zip › Supplementary Table S1.xlsx]

## Sheet: Table S1
Table S1 CAPS makers primer sequence
CAPS markers name	Forward primer sequence (5’ to 3’)	Reverse primer sequence (5’ to 3’)
M1E9-EcoR I	CGTCTGATTGCTTCAACATT	AGATGAGAACTACTTGGCTATC
M1E11-EcoR I	TTCGGTTGATGCTGTTAGA	CTGATGCTGAAGAAGTAGGA
M1E3-EcoR I	CTTCATCCTTCCGTGTCTTA	ATGTTGTGGTTGGAGATCC
M1H8-BamH I	TGAGGACGATGAGGAAGAT	TTGGAAGCAACCGTGATAT
M1E7-BamH I	GTTATGATGTCGTAGGAGTTAG	TCCACCACTGTCTATCTCA
M1H5-EcoR I	GCAAGAAGTAGAGTAGAGGA	ATTGTCTGAGAAGTTCAAGC
M1E4-EcoR I	TAAACACAACTGGGTAACAC	AAGCGTGATTGGTTATTGAG
M1H6-EcoR I	GATGGATGTGAAGGAATGGT	GCCGATGTGGACAATAGAA
M1H11-EcoR I	AATGGACCGAGGTAGATACT	GGACGGATTCATAACTATTCAG
M1E1-EcoR I	AACATGGAGGAGTGGAAGA	ACAATAGAGACCAGAGTTAGAG
M2E2-EcoR I	CATAAGTTGAGCCGATATTGG	CACAGATGTTGCTGCTACT
M2E3-EcoR I	CGAGCGGAAATATCTTAGTG	CACATTGATTGAGACATTGC
M2H6-Hind III	GGTCGTTACAGATGTTCTATG	GTAGTGAGTCTCTTACAGGATA
M2E5-EcoR I	TTCCAGTAAGCAACTACAGT	GAATCTCAATCCTCCACAAC
M2H11-EcoR I	GTTCAATTCTCGGTGTTAGC	GGTGCCTGATACTATGGATAT
M2E7-EcoR I	CATTCATTGGAAGGCGATAG	CTCTGTACCTAGTTAGAAGTCA
M2E12-EcoR I	CAACGACTAACTACCACCAA	TTCTGAGTAGACTGCCAATG
M2H10-EcoR I	TAGCATCCATGTCATCAAAC	ATGTGTTCAGGCAAGAATG
M2E1-EcoR I	GATTTGGACAGCATTTGAAC	TCATCTTACCTAAGCCTCAT
M2H5-EcoR I	CGACACGACCTTACTTGAA	ATCTACAGCAACTGCACTAA
M3E1-EcoR I	CAATCACTGCGACATATTCA	GTGCTAACTGCCAACAATT
M3E3-EcoR I	TCAAGCATAACTCCATAGCA	TGTCACTTAGGCGGATAAC
M3E5-EcoR I	TGTAGTCCTAACACTTCTCA	GTCTCCATCCAACCAGTAA
M3H2-EcoR I	TCACTACACAATCGCTTACA	CGTAGCATAGTAGCAGACAT
M3H6-EcoR I	ATTGGCAAGTGTTACTCTCA	CATCAAACAGATCCTTAGAAGC
M3E4-EcoR I	AACACTCATCCAATCAAGGT	CCATATAGAGGAAGGACAAGTA
M3E8-EcoR I	CCATCTCACATAGTTAAGAGTC	TGTTTAGGGCTATCCTAGAA
M3E10-EcoR I	CTCCCATTTGAGAGAAACTTAG	TCACAAGAATGGAAGATGCT
M3E7-EcoR I	GTTTCAACACCGCACAAAT	GGTAGTGGTTGCTGTTATGA
M3H5-EcoR I	GTTGGTCAACAACAAGTTAG	CGACAAGTGTCCAGTAGTA
M4E2-EcoR I	CTCGTTCACACTGTCAACT	CCTGGAAGAATCACACCTAA
M4E3-EcoR I	AACTGACATTCAACATCCG	GACCAACTGCCAATTACTG
M4E6-EcoR I	AACAAGTGAGTGGATGATTG	TTAGTAGTGGCAGGTTCTC
M4E7-EcoR I	AGTATCAAGACACCAAGAGG	GCAGTTAAGCTAGACAACAA
M4H3-EcoR I	TGGCTTACCTCAGACTACA	TGAACACCTACAACGCAAT
M4H1-EcoR I	TCATGGATCGTTAGCAACA	CTTGGAGGATAACTGTGAATC
M4E4-EcoR I	TGCATGTGAGAATCTTAGTCC	CCTCCATTCATTATCTGCCATA
M4E10-EcoR I	CACTCAAACAACAGTATGCT	CAAACTATGGACTATGTCTCTC
M4E8-EcoR I	AAGGTTGGTGGAGTGATTG	AAGTTGACAGGTAGACAGTAG
M4H8-EcoR I	TTGGTAAGTCCTTTCCTGAT	GGTGACCTTAGCTCATCTC
M5H1-EcoR I	TTGTTGCTGCTGTATCATCT	AGGGAAAGTGAAGAAGAGAAG
M5E1-EcoR I	CGGTGAGATATGCTATGGTT	CGTCGGGAGAGTATTTGAA
M5E3-EcoR I	AGCGATACTCTCACCTTTG	CGTATATGACCTTCACTTGAC
M5H3-EcoR I	CCTCCATGCCATTACACAA	GAAGTTGACAGTCCACATTG
M5E5-EcoR I	GGTATTGTGCTGGTTGAGA	TCGTGAGATGTTGTGATAGG
M5E7-EcoR I	AGATGGTCTTGCTTCTTCC	ACTTAATTGACTTGGCTTGG
M5H7-EcoR I	TCCAACCTTGACCATCTTA	GGTTAGTCATCATTTCTTCC
M5H9-EcoR I	AGCCTGAGTTCACTTGTTC	CTTCCACATCCTGTTCATAAC
M5E6-Hind III	GTGTGGATGACCGTGTATA	GACAGCATGTTGTATCAGAA
M5E9-Hind III	GAAGGAAAGCCCACTATGT	CCTCTATTCAGATTGTCACTC
M6E1-EcoR I	CCTGATACCAATTCCAATCC	AGCCACCTCCAACTTATTC
M6E3-EcoR I	TTCTCGGTGAGGAGTGAT	GATGTGAACGTCTTCATTGA
M6H2-EcoR I	AATGCGGAATCTGAAGCT	GTTGACTCCTGACTTCTTATG
M6E5-EcoR I	CTGTGTACTAATGGAACTGAG	ACCACTGTTAGGTTGGATAA
M6H1-EcoR I	CCTACAGTATAAGCAGTGACA	AGTGAGAACCTTGAGGAGTA
M6E4-EcoR I	GGCATATAGACCAAGATGAC	AAGATCGCTGACATTGAGA
M6E6-EcoR I	GAGGTAGCCATTCTATCTTGA	CTTGCTCGACTCCTAACATA
M6E7-EcoR I	GAGAGGAGTTAAGGAGAGTTA	GACAGATCACAGATGCTATAC
M6E9-EcoR I	CCTATCAACTCGTGCTTCT	AGATGAACTCGCAACCAAT
M6H4-EcoR I	GCGTAATCATTAGGCGAAT	TTCTCAACTCCTTCACCAA
M6H7-EcoR I	TAGGATCACGATATAGGAAGAG	CGAGGAGTTATTGCTACTAATC
M6E8-EcoR I	TTGCTTCTCAGGATTAGTCT	AACCAACCGAATACAAGATG
M6E13-EcoR I	CATCCACCATCAACACCTA	ATCCAACCAACCAATACCTA
M6A-Hind III	CTCATACTCCTGAATGTCTCT	CTTCCATAGTTACGCAATCA
M6B-EcoR I	GATTTGGGTCACGATTATGT	GGAATTGAGAACGATGAGAG
M8C-EcoR I	GGAGAGTACGAGTTAAGAGAC	GGAAGGTTGAGTGTTGGAT
M6D-Hind III	ATATACGAGGAGTAGGAAGG	GGCTTACTATCTGCTGAAG
M6E-Hind III	GAGATTCGTGTACGTGTATG	GGCTTTAATTGGTGGTTCTT
M7E1-EcoR I	CCTTCGTAAGAACTCTCACC	GAACCACTGTACCAAGTATATG
M7E3-EcoR I	TGCAACTCTACTTCCTACAA	AGTATTATGGCTCGGTGAA
M7H2-EcoR I	TCTCGTAATTCTTGGTCTGT	CTTCCTCTAACTCATCATCAC
M7H3-EcoR I	TGTGCCAGTTGATCTCTTG	GGTAATCCAGTTCAGTGCTT
M7E5-EcoR I	CCTTCGCTGGTTATCATCTA	TTGTGCCTATGGGAATACG
M7H6-EcoR I	AGGCGTTCTGATATTCTCTT	TCCGTCTCTTGTAGTGGTA
M7E6-EcoR I	ATCTTGGATGGTATGCTGAA	CTTGTGCTAGACGAAGGAA
M7E9-EcoR I	CGTTGGATATGAACCATTGT	CAGTTCGGTATAGTTGTTGAC
M7H8-EcoR I	CGCCTTGATTAGACCTTGA	ACACTGTTGGATGGTAAGC
M8B1-EcoR I	GTAGCAACATGGAACGGAACC	GCCAGCAACGATGAGTTACTT
M8E2-EcoR I	AATCCTGGGCATCTGGTGAG	GGCTCCATTGTTGTAATCTGGTT
M8E4-EcoR I	GCACTAGACAATATTCGCTAAGTTC	CCTGAGCCAAGCCTCTGTT
M8E5-EcoR I	CTGAAGACTAGGCTTTAACCACAA	GCATCCGCTGTTATTCTCACTA
M8H3-EcoR I	TTACCTGAGATAGCTGCTGTGT	GATTCTGAACATGGTCTTCATCTTC
M8H6-EcoR I	GGTGTTGAATCTTGTTCACTCTATG	AGTTGTTATGGTGGTTGTCTCA
M8E8-EcoR I	CGAGTTAGTCTCTACCACCATT	ACCACCAAGAATATGAGTATGC
M8H1-EcoR I	CATCATGTCTGAAGGATAAGTTGAG	CGATCAGGCAATTCTGGAATAAG
M9E2-EcoR I	ACATCTTCTCATTTCCTCCA	GGACTCGTACAACAATCAAT
M9E3-EcoR I	CATCAGGAACACTATCTCATTG	TAACCTCTATCGTCAGTCTAAG
M9H3-Hind III	TGGATAGACCGACATGGAA	TTGTTGAATGCCTGATTGAC
M9H4-EcoR I	TTGAGTCAATCTAGGTCCAA	CCATCATTTGCTACAGAACT
M9E5-Hind III	CGTCTGTTGAGATAACTTGAG	CATACCCTAAGCGTTCTTTG
M9H1-EcoR I	GGTGCTTGTGATGGATTAAC	AGAGTTCTTAATGGCAGAGG
M9E6-EcoR I	TCTTCAGCAATTAGGTACTCC	TGGTGTTGATGTAAGTGGAA
M9E7-EcoR I	AGCATTCCAACAAGGTAGAT	ATAGAGATATAGGACGACCATC
M9H8-EcoR I	GCATTCTAACGACCACACT	GCTCACAATGTCAGTCTCA
M10E2-EcoR I	CGTCACACTTACTACATAAGC	CGTCCAGATTCACTCATTCT
M10H1-EcoR I	GGTCACCAACACTTCATAATC	TCAATAAGTTCCCACCCTATC
M10E3-EcoR I	CCCTGACCATCTTTATCCTTA	CCTAACTTGTCGTGGAACT
M10H4-EcoR I	GGTTGTTATTCACTCTCTACTC	CTGTACTGCTACTACATACGA
M10E5-EcoR I	GGAGGAAATGGGTTTGGAT	GGTACTCTATTCTAGCTTAGGT
M10H6-Hind III	TGGATGGCTATGAAAGTTTG	CTGAAGGGTGCTTAGATTATG
M10H7-EcoR I	AACACATATCACCGACAACT	TGCGAAATTGGGTAACTCA
M10E7-Hind III	CCATCAAATCTCTCGCAATA	TGTGAGGCTAATGTAATGAG
M11E3-EcoR I	ACCGTTGACTAATGATGGAT	TCCTCCTTTCTCTGATGTTT
M11E2-EcoR I	ATAGTGGTTCAGCAAGTTG	AAGCCTATCACTCATTCTCA
M11E4-EcoR I	GTGATCTATCGTACTGGCTT	GGGAGAAACACAACTCTTAGA
M11H3-EcoR I	TATGCTCAACCAAGTGGAT	CTATGTTCTGTATGCACCTT
M11E5-EcoR I	TAATCGCAACTCACCTAACT	TGGAGTGAAGAATGAGACAA
M11E7-EcoR I	GTACAGGCATGAGAGTAGG	GCTCCAACGATCCAAGTT
M11E9-EcoR I	TGGAGATGTCAGGTTGTG	TGATGTTGAGAGTGTTCTAC
M11E10-EcoR I	TGGTTAATGGAGAAGGCTTA	CAATTCAGCGTTAGGTGATT
M11H6-EcoR I	CAGTATCCATCTACAGAGTCA	AACCTGCTATGCTATTGCTA
M12E2-EcoR I	CTCTAAGGCTAACGACCATT	CACGACCACATGATCTTGA
M12E3-EcoR I	ATAGTTCACGATGACCATCT	GAGGATATAGCAGAGAATCTTC
M12H2-EcoR I	GAGAACCCAATATCCCAAGT	GCATTGTTGACAGCGTATT
M12E4-EcoR I	CAACTTCATACCTACTCATTCC	CGAACATGCCTGCTATACA
M12E6-EcoR I	CGGGTAAATGTTAGGTTTGG	GTGTTTGATGATGACTTCTGG
M12H7-EcoR I	CTCACAGTCAACTTCTAAGC	AACGAGATGTCCTCAACTC
M12H3-EcoR I	TTCTTCTAACTGCCTCGTT	GTAGCTTCCGTATAATCATCC
M12E8-EcoR I	GCTTGTGAGAAGAACTAACC	GTTGTCCTTGTGAATACGC
M12E9-EcoR I	AGACGGTTATCGGAACTTAG	GAGGAGGAGTCAATATCAGAT
M12E5-EcoR I	CCAATTCGTACTCCACTGA	ATAGACATGACCACCAAGTT
