# Supplementary material for: Genetic Mapping and QTL Analysis of Fruit Traits in Melon (Cucumis melo L.)
Source: Curr Issues Mol Biol. 2023 Apr 14;45(4):3419–33. doi: 10.3390/cimb45040224 (PMC10137213; doi:10.3390/cimb45040224)
Supplement: Supplementary file 1 [file cimb-45-00224-s001.zip › Supplementary Table S2.xlsx]

## Sheet: Table S2
Table S2 The PCR reaction systerm
Reagent (initial concentration)	Final concentration	volume
DNA(50ng/μL)	5ng/μL	2μL
upstream primer (10μM/μL)	0.5μM/μL	1μL
downsteram primer (10μM/μL)	0.5μM/μL	1μL
10 × Taq Buffer	1 ×	2μL
dNTPs Mix (10mM/μL)	0.15mM	0.3μL
Taq DNA Polymerase (500U/μL)	5U/μL	0.2μL
ddH2O		13.5μL
