# Supplementary material for: Genetic Mapping and QTL Analysis of Fruit Traits in Melon (Cucumis melo L.)
Source: Curr Issues Mol Biol. 2023 Apr 14;45(4):3419–33. doi: 10.3390/cimb45040224 (PMC10137213; doi:10.3390/cimb45040224)
Supplement: Supplementary file 1 [file cimb-45-00224-s001.zip › Supplementary Table S3.xlsx]

## Sheet: Table S3
Table S3: Summary of detected SNP variants distribution in re-sequenced parental lines of melon.
Chromosomes	Genetic length (bp)	variants	Variants rate
Chr01	37037532	270720	136
Chr02	27064691	190701	141
Chr03	31666927	205798	153
Chr04	34318044	237763	144
Chr05	29324171	180524	162
Chr06	38297372	257527	148
Chr07	28958359	175947	164
Chr08	34765488	179304	193
Chr09	25243276	150871	167
Chr10	26663822	155340	171
Chr11	34457057	230064	149
Chr12	27563660	153477	179
Total	375360399	2388036	157
